# Supplementary material for: Radiative analysis of luminescence in photoreactive systems: Application to photosensitizers for solar fuel production
Source: PLOS journal article supplement (doi:10.1371/journal.pone.0255002), 2021-07-22
Supplement: S4 (10.1371/journal.pone.0255002.s004) [file journal.pone.0255002.s004]

## Nomenclature

|                                     |                                                                                          |                                                                  |
|-------------------------------------|------------------------------------------------------------------------------------------|------------------------------------------------------------------|
| $\mathcal{A}(\mathbf{r})$           | Local Volumetric Rate of Photons Absorbed (LVRPA)                                        | $[\text{mol}_{h\nu}.\text{m}^{-3}.\text{s}^{-1}]$                |
| $\langle \mathcal{A} \rangle$       | Mean Volumetric Rate of Photons Absorbed (MVRPA)                                         | $[\text{mol}_{h\nu}.\text{m}^{-3}.\text{s}^{-1}]$                |
| $A$                                 | Absorbance                                                                               | $[-]$                                                            |
| $C$                                 | Concentration                                                                            | $[\text{mol}.\text{m}^{-3}]$                                     |
| $\mathbf{e}_x$                      | Unit vector along the $x$ abscissa                                                       | $[-]$                                                            |
| $E$                                 | Molar cross-section                                                                      | $[\text{m}^2.\text{mol}^{-1}]$                                   |
| $f$                                 | Probability that a photon absorbed within the reactor is absorbed by the photosensitizer | $[-]$                                                            |
| $G$                                 | Irradiance                                                                               | $[\text{mol}_{h\nu}.\text{m}^{-2}.\text{s}^{-1}]$                |
| $H_{H_2}$                           | Henry constant of hydrogen in triethylamine and water                                    | $[\text{m}^3.\text{Pa}.\text{mol}^{-1}]$                         |
| $I$                                 | Intensity                                                                                | $[\text{mol}_{h\nu}.\text{m}^{-2}.\text{sr}^{-1}.\text{s}^{-1}]$ |
| $k$                                 | Extinction coefficient                                                                   | $[\text{m}^{-1}]$                                                |
| $l$                                 | Extinction length                                                                        | $[\text{m}]$                                                     |
| $L$                                 | Slab thickness                                                                           | $[\text{m}]$                                                     |
| $N$                                 | Number of Monte Carlo algorithm iterations                                               | $[-]$                                                            |
| $P$                                 | Pressure                                                                                 | $[\text{Pa}]$                                                    |
| $P^{(j)}$                           | Distribution of a scattering orders                                                      | $[-]$                                                            |
| $p(\lambda)$                        | Spectral source probability density function                                             | $[\text{nm}^{-1}]$                                               |
| $p(\mu \mu')$                       | Phase function                                                                           | $[\text{sr}^{-1}]$                                               |
| $\mathcal{P}_A$                     | Absorptance                                                                              | $[-]$                                                            |
| $q_0$                               | Photon flux density                                                                      | $[\text{mol}_{h\nu}.\text{m}^{-2}.\text{s}^{-1}]$                |
| $R$                                 | Gas constant                                                                             | $[\text{J}.\text{K}^{-1}.\text{mol}^{-1}]$                       |
| $\mathbf{r}$                        | Location ( $\ \mathbf{r}\  = [\text{m}]$ )                                               |                                                                  |
| $r_i(\mathbf{r})$                   | Local volumetric chemical reaction rate                                                  | $[\text{mol}_i.\text{m}^{-3}.\text{s}^{-1}]$                     |
| $\langle r_i \rangle$               | Mean volumetric chemical reaction rate                                                   | $[\text{mol}_i.\text{m}^{-3}.\text{s}^{-1}]$                     |
| $t$                                 | Time                                                                                     | $[\text{s}]$                                                     |
| $\mathbf{u}$                        | Unit propagation direction                                                               | $[-]$                                                            |
| $V_L$                               | Liquid volume in the photoreactor                                                        | $[\text{mL}]$                                                    |
| $V_G$                               | Gas volume in the headspace of the photoreactor                                          | $[\text{mL}]$                                                    |
| $w$                                 | Monte Carlo algorithm weight                                                             | $[-]$                                                            |
| $x = \mathbf{r} \cdot \mathbf{e}_x$ | Abscissa in the slab                                                                     | $[\text{m}]$                                                     |

### *Greek letters*

- $\alpha$  Single-scattering albedo with catalyst absorption [-]  
 $\delta$  Relative difference between overall quantum yields [-]  
 $\Delta$  Relative difference between absorptance models [-]  
 $\lambda$  Radiation wavelength [m]  
 $\mu = \mathbf{u} \cdot \mathbf{e}_x$  Cosine of propagation direction [-]  
 $\sigma$  Standard error [-]  
 $\tau$  Optical thickness [-]  
 $\Phi$  Luminescence quantum yield  $\equiv$  single-scattering albedo [-]  
 $\varphi$  Overall quantum yield [ $\text{mol}_i \cdot \text{mol}_{h\nu}^{-1}$ ]

### *Subscripts/Superscripts*

- $A$  Refers to absorption  
 $cat$  Refers to catalyst  
 $\lambda$  Refers to wavelength  
 $min$  Minimum value  
 $max$  Maximum value  
 $S$  Refers to scattering  
 $elastic$  Refers to elastic approximation  
 $exp$  Refers to experimental measurement  
 $gray$  Refers to gray approximation  
 $i$  Refers to incident source  
 $j$  Refers to the  $j^{th}$  order in the successive order of scattering expansion  
 $L$  Refers to the luminescence source  
 $P1$  Relative to  $P1$  approximation  
 $r$  Relative to rear face of the photoreactor  
 $S$  Refers to scattered (luminescence) radiation  
 $SS$  Refers to Single-Scattering approximation  
 $-$  Refers to gray value  
 $\wedge$  Refers to elastic value  
 $1*$  Refers to singlet state  
 $3*$  Refers to triplet state

### *Acronyms*

Et<sub>3</sub>N Triethylamine

EY<sup>2-</sup> Eosin Y molecule

F Fluorescence

FeFe Diiron thilate complex catalyst

ISC Intersystem-crossing

MVRPA Mean Volumetric Rate of Photons Absorbed

NR Non Radiative

RTE Radiative Transfer Equation
